# Supplementary material for: CuIn(S,Se)2 thin films prepared from a novel thioacetic acid-based solution and their photovoltaic application
Source: Royal Society of Chemistry journal article supplement (doi:10.1039/c4cp00045e), 2014-01-01
Supplement: c4cp00045e1.pdf [file c4cp00045e1.pdf]

## Supporting Information

### CuIn(S,Se)<sub>2</sub> Thin Films Prepared from a Novel Thioacetic Acid-based Solution and Their Photovoltaic Application

Yian Xie,<sup>a</sup> Yufeng Liu,<sup>a,\*</sup> Yaoming Wang,<sup>a</sup> Xiaolong Zhu,<sup>a</sup> Aimin Li,<sup>a</sup> Lei Zhang,<sup>a</sup>  
Mingsheng Qin,<sup>a</sup> Xujie Lü,<sup>a</sup> and Fuqiang Huang<sup>a,b,\*</sup>

<sup>a</sup> CAS Key Laboratory of Materials for Energy Conversion, Shanghai Institute of Ceramics, Chinese Academy of Sciences, Shanghai 200050, P.R. China

<sup>b</sup> State Key Laboratory of Rare Earth Materials Chemistry and Applications, College of Chemistry and Molecular Engineering, Peking University, Beijing 100871, China

\* Corresponding author. Fax: +86-21-52416360. Email: [liuyf@mail.sic.ac.cn](mailto:liuyf@mail.sic.ac.cn)  
Fax: +86-21-52416360. Email: [huangfq@mail.sic.ac.cn](mailto:huangfq@mail.sic.ac.cn)

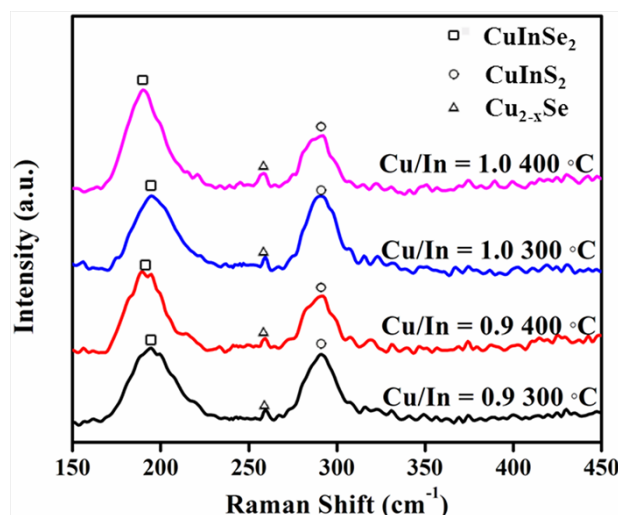

**Fig. S1.** Raman spectra of CISSe thin films with different Cu/In ratios of 0.9 and 1.0 annealed at 300 °C or 400 °C. Copper selenide phase could be detected from all samples.

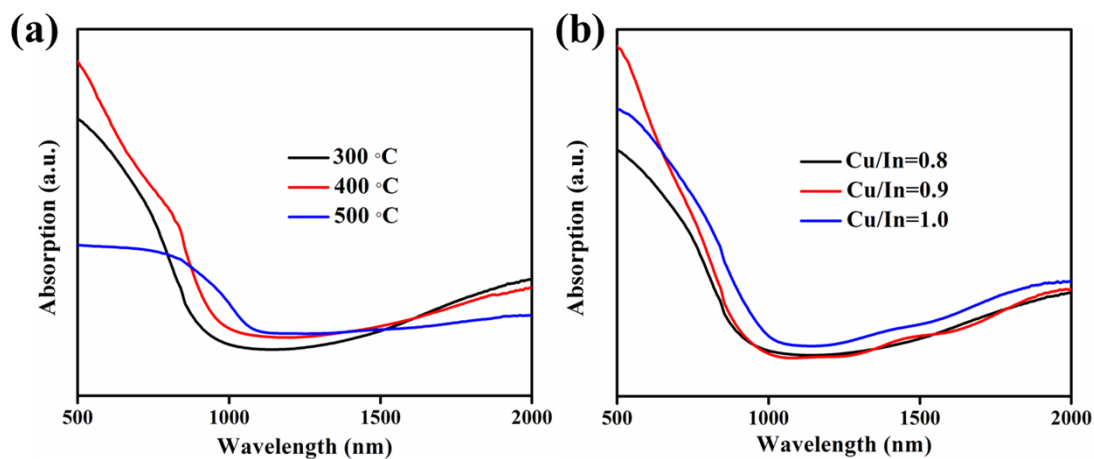

**Fig. S2.** Absorption spectrum of CISSe thin films with (a) different Cu/In ratios annealed at 500 °C, (b) different annealing temperature with Cu/In ratio of 0.8 (precursor solution).

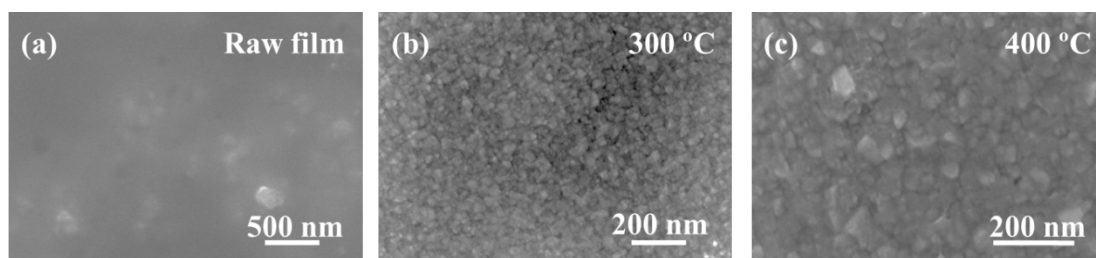

**Fig. S3.** Top view FESEM images of (a) CIS raw film and CISSe films annealed at (b) 300 °C and (c) 400 °C with Cu/In ratio of 0.8.

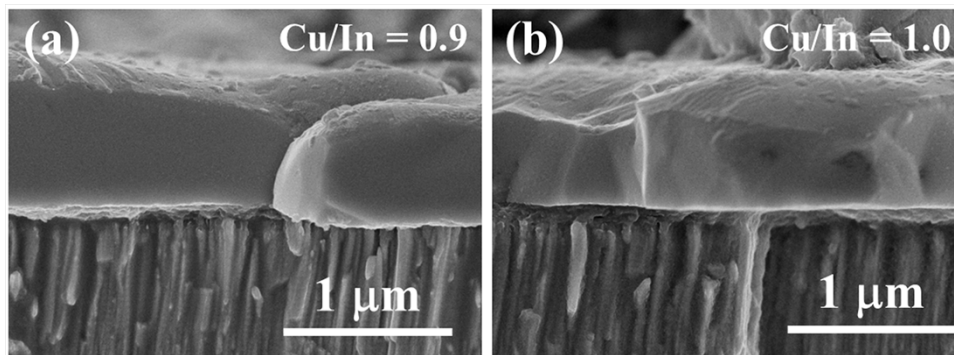

**Fig. S4.** Cross sectional FESEM images of CISSe thin films with Cu/In ratios of (a) 0.9 and (b) 1.0 after annealing at 500 °C for 30 minutes.

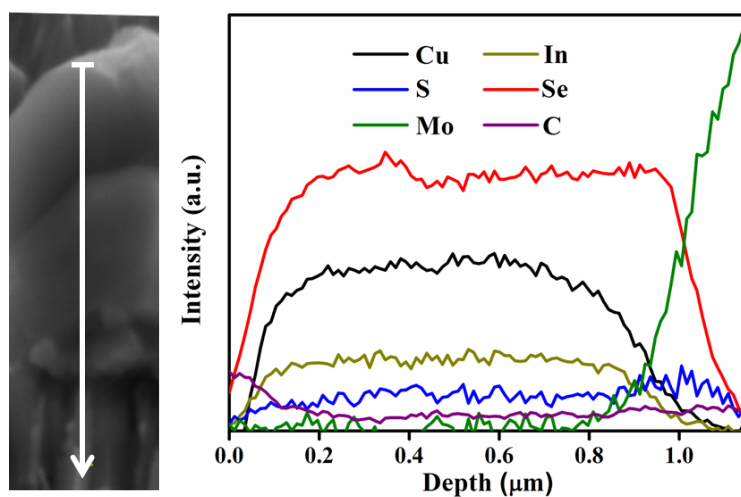

**Fig. S5.** EDS line-scan profile of CISSe thin film along the direction.

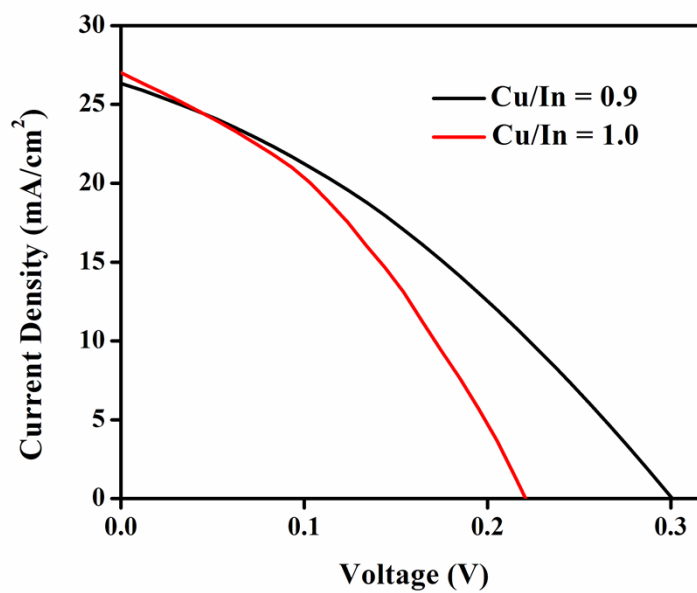

**Fig. S6.** Current-voltage (J-V) curves of the CISSe-based thin film solar cells with Cu/In ratios of 0.9 and 1.0 under a standard AM 1.5 solar illumination at an intensity of  $100 \text{ mW}/\text{cm}^2$
